# Supplementary material for: Dual determination of nitrite and iron by a single greener sequential injection spectrophotometric system employing a simple single aqueous extract from Areca catechu Linn. serving as a natural reagent
Source: Royal Society of Chemistry journal article supplement (doi:10.1039/d2ra03870f), 2022-01-01
Supplement: d2ra03870f1.pdf [file d2ra03870f1.pdf]

## Supplementary Materials

### Dual determination of nitrite and iron by a single greener sequential injection spectrophotometric system employing a simple single aqueous extract from *Areca catechu* Linn. serving as natural reagents

Kraingkrai Ponghong<sup>a</sup>, Watsaka Siringkhawut<sup>a</sup>, Chang Young Lee<sup>b</sup>, Norio Teshima<sup>c</sup>, Kate Grudpan<sup>d</sup>, and Sam-ang Supharoek<sup>e,f,\*</sup>

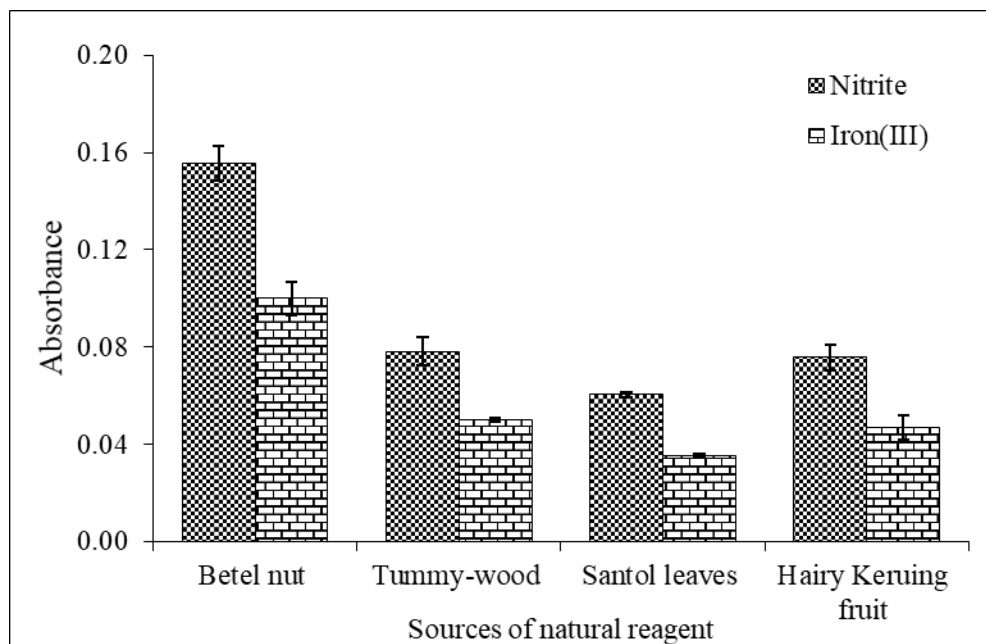

**Fig. S1** Absorbance of azo dye obtained from different plant sources

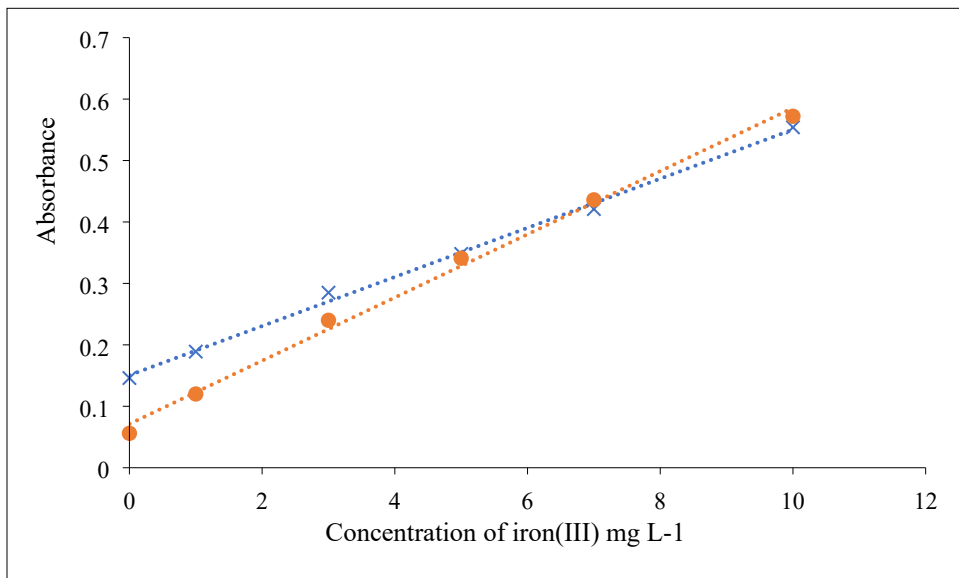

**Fig. S2** Absorbance of iron(III) complex at ○ 560 nm and □ 430 nm

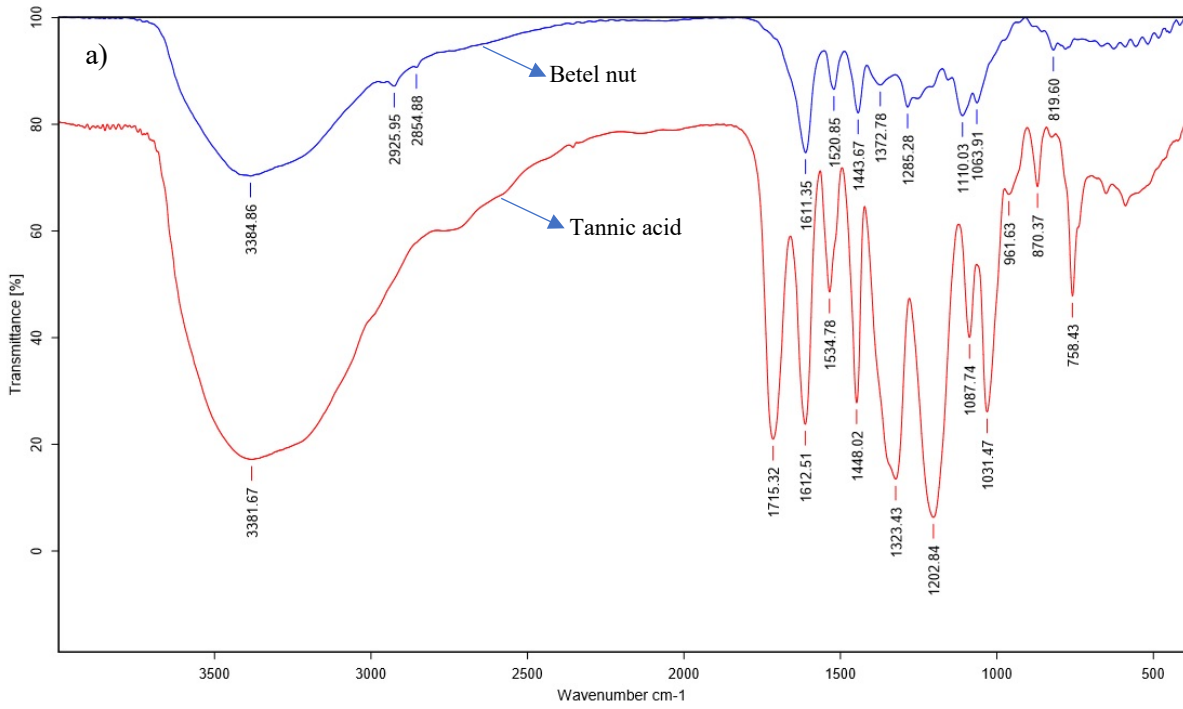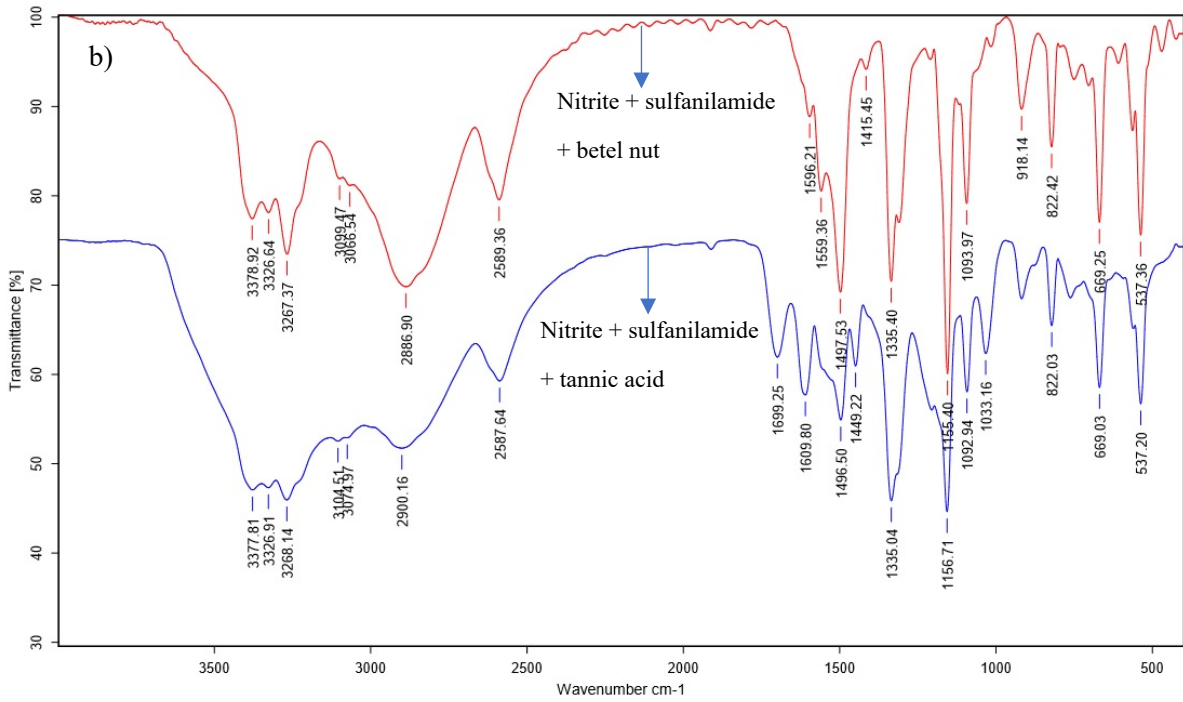

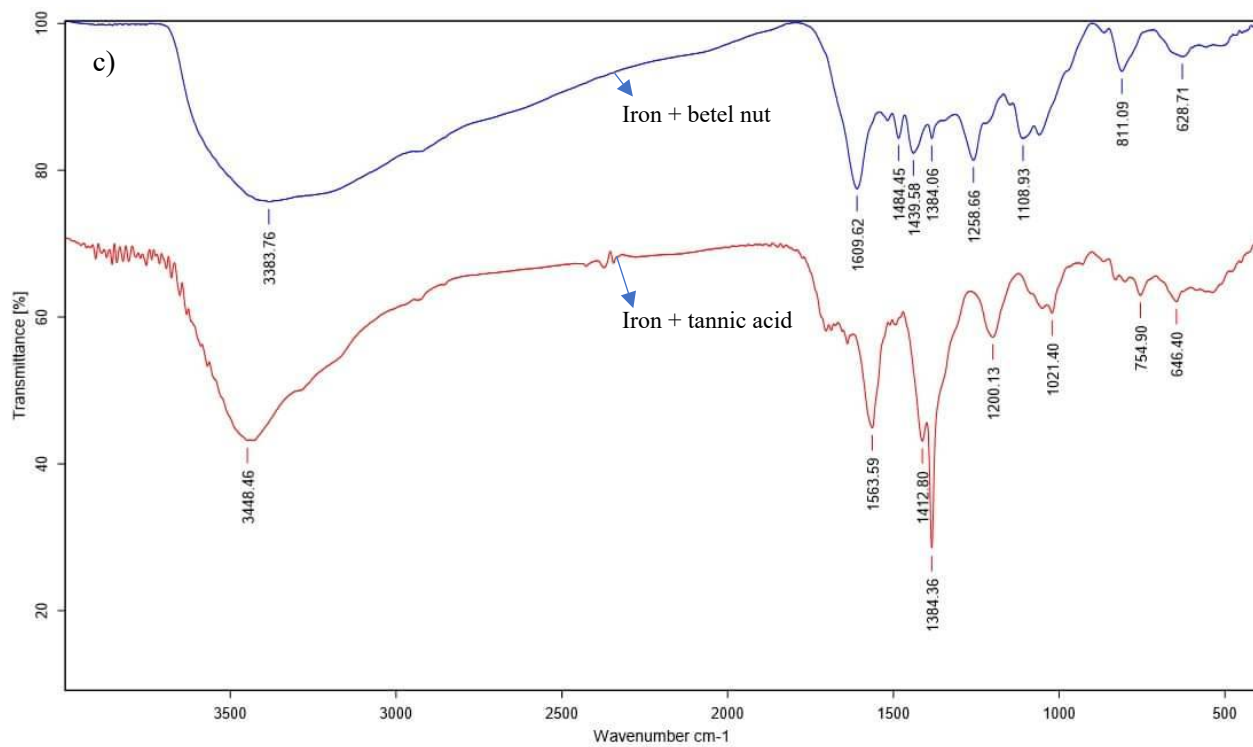

**Fig. S3** FTIR spectra; a) natural reagent and tannic acid standard; b) nitrite reaction with tannic acid and c) iron(III) reaction with natural reagent.

**Table S1** Analytical characteristics of the proposed method and other reports for determination of nitrite and iron.

| Technique                                                                  | Reagent                                                                           | Target                   | Linear range                                                                  | Estimated analysis time (min/sample) | LOD                                                                                                                                      | Sample                                        | Ref. |
|----------------------------------------------------------------------------|-----------------------------------------------------------------------------------|--------------------------|-------------------------------------------------------------------------------|--------------------------------------|------------------------------------------------------------------------------------------------------------------------------------------|-----------------------------------------------|------|
| UV-Vis micro-spectrophotometry with liquid-phase microextraction           | Griess reagent                                                                    | Nitrite                  | 10-100 $\mu\text{g L}^{-1}$                                                   | 7                                    | 1.5 $\mu\text{g L}^{-1}$                                                                                                                 | Environmental water                           | [24] |
| Spectrophotometry-based microplate method                                  | Griess reagent                                                                    | Nitrite                  | 1-400 $\text{ng mL}^{-1}$                                                     | -                                    | 2.5 $\text{ng mL}^{-1}$                                                                                                                  | Urine and blood                               | [25] |
| Solid phase spectrophotometry                                              | Griess reagent                                                                    | Nitrite and nitrate      | 0-140 $\text{ng mL}^{-1}$ (nitrite)<br>0-560 $\text{ng mL}^{-1}$ (nitrate)    | -                                    | nitrite (5 $\text{ng mL}^{-1}$ ) and nitrate (40 $\text{ng mL}^{-1}$ )                                                                   | Water                                         | [26] |
| Vortex-assisted liquid-phase microextraction with UV-vis spectrophotometry | -                                                                                 | nitrite                  | 0.1-300 $\text{ng mL}^{-1}$                                                   | -                                    | 0.035 $\text{ng mL}^{-1}$                                                                                                                | Meat and chicken products                     | [27] |
| Sequential injection lab-on-valve spectrophotometry                        | 2-(5-bromo-2-pyridylazo)-5-[N-n-propyl-N-(3-sulfopropyl)amino]aniline (5-Br-PSAA) | Iron(II) and copper (II) | Copper (0.1-2 $\text{mg L}^{-1}$ )<br>iron (0.1-5 $\text{mg L}^{-1}$ )        | 3 (Copper and iron)                  | copper (50 $\mu\text{g L}^{-1}$ )<br>iron (25 $\mu\text{g L}^{-1}$ )                                                                     | Industrial wastewater                         | [41] |
| Spectrophotometry                                                          | Natural reagent extracted from <i>Leucaena leucocephala</i> (Lam.)                | Iron(III)                | 0-10 $\text{mg L}^{-1}$                                                       | -                                    | 0.2 $\text{mg L}^{-1}$                                                                                                                   | Blood tonic                                   | [42] |
| Colorimetric assay with ultrasound-assisted extraction                     | Natural reagent extracted from pomegranate peel                                   | Iron(III)                | 1.0 - 10.0 $\text{mg L}^{-1}$                                                 | -                                    | 0.31 $\text{mg L}^{-1}$                                                                                                                  | Pharmaceutical formulations                   | [43] |
| Flow injection-spectrophotometry                                           | Natural reagent extracted from <i>Phyllanthus emblica</i> Linn.                   | Iron(III)                | 0.50-20.0 $\text{mg L}^{-1}$                                                  | 0.7                                  | 0.31 $\text{mg L}^{-1}$                                                                                                                  | Pharmaceutical preparations and water samples | [44] |
| Sequential injection spectrophotometry                                     | Astilbin extracted from Smilax china L. root                                      | Iron(III) and manganese  | Iron(III) (1-8 $\text{mg L}^{-1}$ ) and manganese (0.5-4 $\text{mg L}^{-1}$ ) | Iron(III) 5<br>Mn (II) 5             | 0.05 $\text{mg L}^{-1}$ iron(III) and 0.20 $\text{mg L}^{-1}$ manganese(II)                                                              | Groundwater                                   | [38] |
| Flow injection-Spectrophotometry                                           | Griess reagent for Nitrite/Nitrate                                                | nitrite/nitrate and      | nitrite/nitrate (50-400 $\mu\text{g L}^{-1}$ ),<br>iron(II)/ iron(III)        | 1.5                                  | $\text{NO}_2^-$ (18 $\mu\text{g L}^{-1}$ )<br>$\text{NO}_3^-$ (30 $\mu\text{g L}^{-1}$ )<br>$\text{Fe}^{2+}$ (0.5 $\mu\text{g L}^{-1}$ ) | Water                                         | [28] |

| Technique   | Reagent                                                       | Target                | Linear range                                                                     | Estimated analysis time (min/sample) | LOD                                                             | Sample        | Ref.        |
|-------------|---------------------------------------------------------------|-----------------------|----------------------------------------------------------------------------------|--------------------------------------|-----------------------------------------------------------------|---------------|-------------|
|             | 2,2-bipyridine and 1-10-phenanthroline for Iron(II)/Iron(III) | iron(II)/iron(III)    | (0.5-6.0 mg L <sup>-1</sup> )                                                    |                                      | Fe <sup>3+</sup> (0.5 µg L <sup>-1</sup> )                      |               |             |
| This method | Natural reagent extracted from betel nut                      | Nitrite and iron(III) | Nitrite (1.0-5.0 mg L <sup>-1</sup> )<br>Iron(III) 1.0-10.0 mg L <sup>-1</sup> ) | 8 (nitrite and iron)                 | Nitrite 0.04 mg L <sup>-1</sup><br>Iron 0.05 mg L <sup>-1</sup> | Surface water | This method |
